# Supplementary material for: Transmissible long-term neuroprotective and pro-cognitive effects of 1–42 beta-amyloid with A2T icelandic mutation in an Alzheimer’s disease mouse model
Source: PubMed Central journal article supplement (PMC11609088; doi:10.1038/s41380-024-02611-8), 2024-06-14

## SUPPLEMENTARY FIGURES

# Transmissible long-term neuroprotective and pro-cognitive effects of 1-42 beta-amyloid with A2T icelandic mutation in an Alzheimer's disease mouse model

Marina Célestine<sup>1,2</sup>, Muriel Jacquier-Sarlin<sup>3</sup>, Eve Borel<sup>3</sup>, Fanny Petit<sup>1,2</sup>, Fabien Lante<sup>3</sup>, Luc Bousset<sup>1,2</sup>, Anne-Sophie Hérard<sup>1,2</sup>, Alain Buisson<sup>3</sup>, Marc Dhenain<sup>1,2</sup>

### Author affiliations:

<sup>1</sup> Université Paris-Saclay, CEA, CNRS, Laboratoire des Maladies Neurodégénératives, 18 Route du Panorama, F-92265 Fontenay-aux-Roses, France.

<sup>2</sup> Commissariat à l'Énergie Atomique et aux Énergies Alternatives (CEA), Direction de la Recherche Fondamentale (DRF), Institut de Biologie François Jacob, MIRCen, 18 Route du Panorama, F-92265 Fontenay-aux-Roses, France

<sup>3</sup> Univ. Grenoble Alpes, Inserm, U1216, Grenoble Institut Neurosciences, GIN, 38000 Grenoble, France

**Correspondence to:** Marc Dhenain, DVM, PhD

Université Paris-Saclay, CEA, CNRS, Laboratoire des Maladies Neurodégénératives, MIRCen, 18 Route du Panorama, F-92265 Fontenay-aux-Roses, France ;

E-mail: [Marc.Dhenain@cnrs.fr](mailto:Marc.Dhenain@cnrs.fr)

### Figure S1.

#### Efficacy of basal synaptic transmission measured thanks to input/output (I/O) curves and paired pulse facilitation ratio (PPR).

**A.** Input/output (I/O) curves. Curves were constructed by plotting mean fEPSPs slopes + SEM as a function of stimulation intensity. There was not significant differences between the different groups (two way ANOVA, A $\beta$  conditions x stimulation intensity interaction (F (18, 170) = 0.17, p>0.9), n = at least 5 different mice per condition). **B.** Paired pulse facilitation ratio (PPR). Curves were constructed by plotting PPR + SEM as a function of inter-pulse interval. There was not significant differences between the different groups (two way ANOVA, A $\beta$  conditions x inter-pulse interval interaction (F (12, 119) = 0.5245, p=0.9), n =at least 5 different mice per condition).

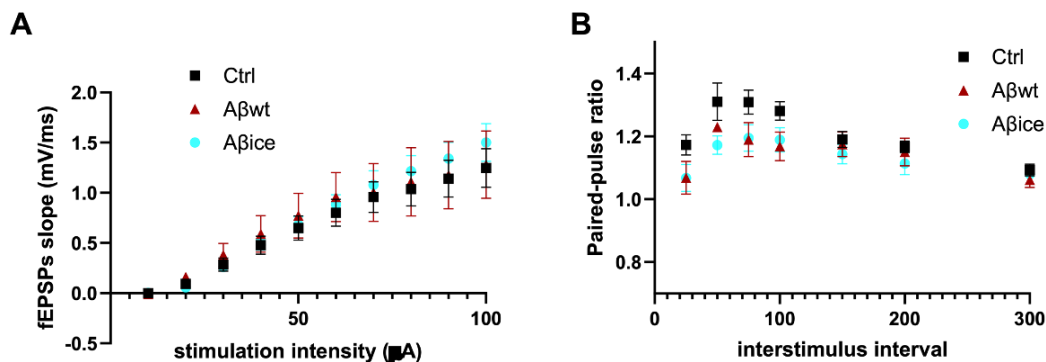

**Figure S2.**

**Neuritic-like plaques in the hippocampus are not astrocytes containing polyglucosan bodies**

**A-B.** AT8 labeling including the primary antibody (**A**) and without the primary antibody (**B**). The neuritic plaques were not detected anymore, thus suggesting that AT8-labeling was specific. **C.** Double staining with GFAP for astrocytes and PAS that detects polyglucosan bodies. The amyloid plaque cores are slightly PAS positive, but astrocytes are not positives. **D-E.** Triple labeling using AT8 (green), GFAP for astrocytes (red) and DAPI (blue) for cell nuclei. AT8-positive lesions were not detected within astrocytes.

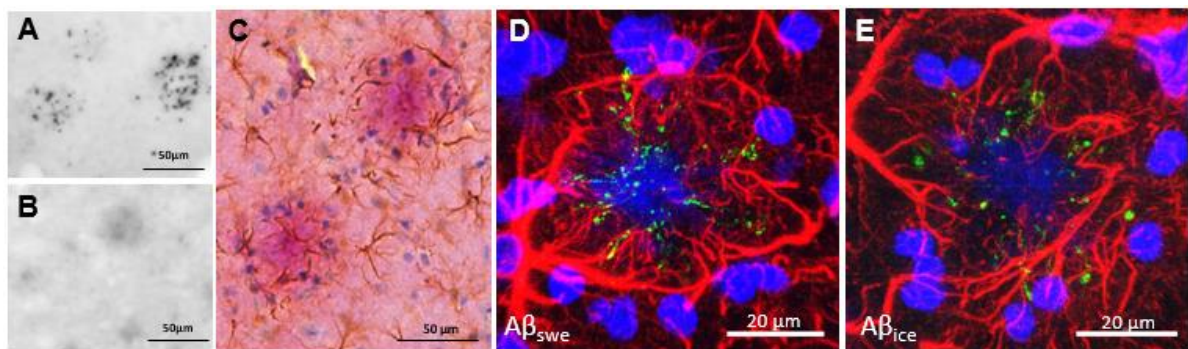

**Figure S3.**

**Microglia and astrocyte labelling in the hippocampus of inoculated APP/PS1<sub>dE9</sub> mice**

**A.** Co-immunolabeling using Iba1 for astrocytes (green), 4G8 for amyloid plaque (red) and DAPI (blue) for cell nuclei. Iba1-positive clusters were found around amyloid plaque. Scale bar = 30  $\mu$ m

**B.** Co-immunolabeling using Iba1 for astrocytes (green), CD68 for lysosomal microglia (red). DAPI (blue) was used for the labelling of amyloid plaque autofluorescence. Overlap of Iba1 and CD68 labelling were found surrounding amyloid plaques. Scale bar = 20  $\mu$ m

**C.** Representative images of GFAP immunolabeling showing astrocytes in the hippocampus of APP<sub>SWE</sub>/PS1<sub>dE9</sub> mice after PBS, A $\beta$ <sub>wt</sub>, or A $\beta$ <sub>ice</sub> inoculation. Scale bars: main images = 100  $\mu$ m, Insets = 20  $\mu$ m

**D.** Quantification of GFAP staining revealed similar astrocyte density in the hippocampus at 4mpi (p=0.6808 ; Kruskal-Wallis with Dunn's multiple comparisons). n<sub>APP/PS1-PBS</sub>=5, n<sub>A $\beta$ wt</sub>=5, n<sub>A $\beta$ ice</sub>=5 mice.

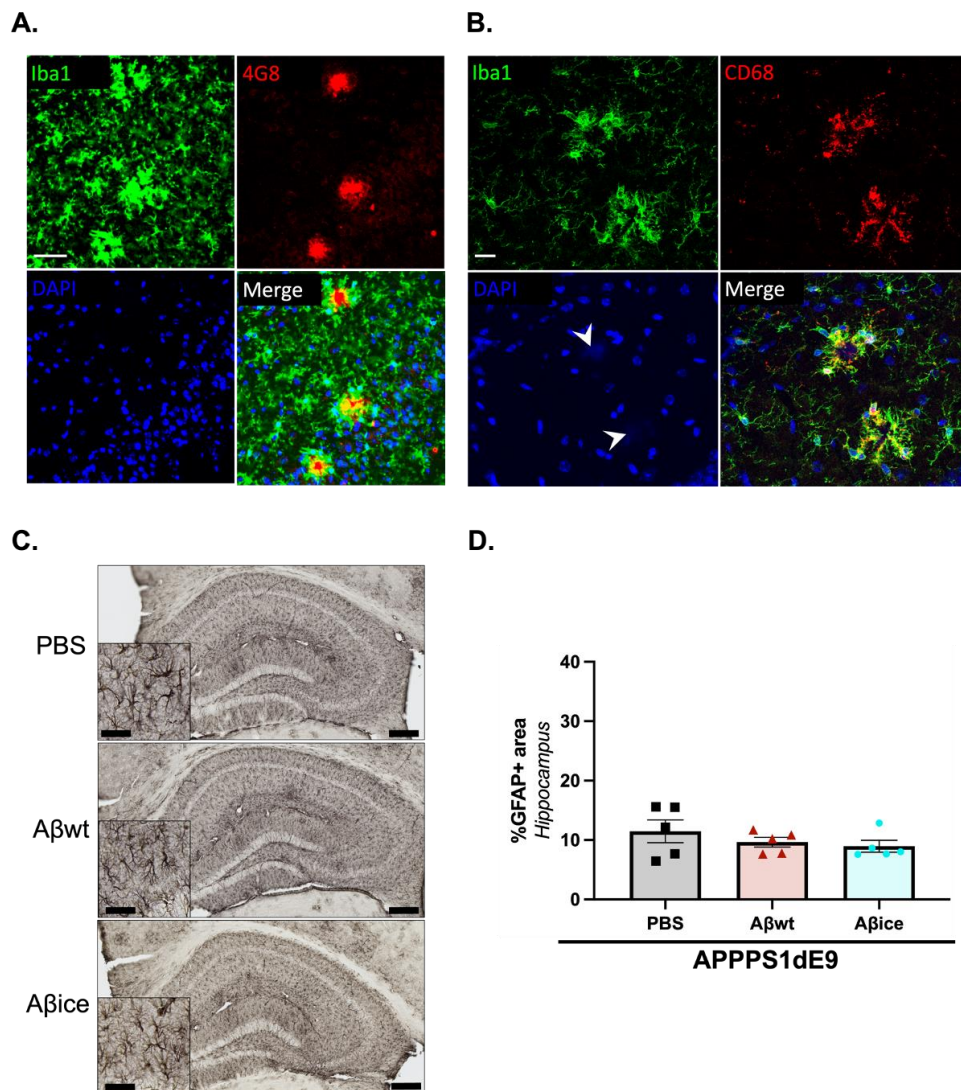

Supplement: 41380_2024_2611_MOESM1_ESM.pdf [file 41380_2024_2611_MOESM1_ESM.pdf]
