# Supplementary material for: Transmissible long-term neuroprotective and pro-cognitive effects of 1–42 beta-amyloid with A2T icelandic mutation in an Alzheimer’s disease mouse model
Source: PubMed Central journal article supplement (PMC11609088; doi:10.1038/s41380-024-02611-8), 2024-06-14
Supplement: 41380_2024_2611_MOESM3_ESM.pdf [file 41380_2024_2611_MOESM3_ESM.pdf]

## SUPPLEMENTARY TABLE 1

# Transmissible long-term neuroprotective and pro-cognitive effects of 1-42 beta-amyloid with A2T icelandic mutation in an Alzheimer's disease mouse model

Marina Célestine<sup>1,2</sup>, Muriel Jacquier-Sarlin<sup>3</sup>, Eve Borel<sup>3</sup>, Fanny Petit<sup>1,2</sup>, Fabien Lante<sup>3</sup>, Luc Bousset<sup>1,2</sup>, Anne-Sophie Hérard<sup>1,2</sup>, Alain Buisson<sup>3</sup>, Marc Dhenain<sup>1,2</sup>

### Author affiliations:

<sup>1</sup> Université Paris-Saclay, CEA, CNRS, Laboratoire des Maladies Neurodégénératives, 18 Route du Panorama, F-92265 Fontenay-aux-Roses, France.

<sup>2</sup> Commissariat à l'Énergie Atomique et aux Énergies Alternatives (CEA), Direction de la Recherche Fondamentale (DRF), Institut de Biologie François Jacob, MIRCen, 18 Route du Panorama, F-92265 Fontenay-aux-Roses, France

<sup>3</sup> Univ. Grenoble Alpes, Inserm, U1216, Grenoble Institut Neurosciences, GIN, 38000 Grenoble, France

### Correspondence to: Marc Dhenain, DVM, PhD

Université Paris-Saclay, CEA, CNRS, Laboratoire des Maladies Neurodégénératives, MIRCen, 18 Route du Panorama, F-92265 Fontenay-aux-Roses, France

E-mail: [Marc.Dhenain@cnrs.fr](mailto:Marc.Dhenain@cnrs.fr)

### Key resource table

| Reagent or Resource                                                       | Source              | Identifier   |
|---------------------------------------------------------------------------|---------------------|--------------|
| <b>Antibodies</b>                                                         |                     |              |
| Goat anti-mouse secondary antibody Alexa Fluor™ 633nm<br>Dilution: 1/500  | Invitrogen          | Cat#A21050   |
| Anti-mouse biotinylated secondary antibody<br>Dilution: 1/1000            | Vector Laboratories | Cat#BA9200   |
| Goat anti-rabbit secondary antibody Alexa Fluor™ 594nm<br>Dilution: 1/500 | Alexa Fluor         | Cat#A11012   |
| Donkey anti-Rabbit IgG Secondary Antibody, HRP<br>Dilution: 1/5000        | Invitrogen          | Cat#A16023   |
| Mouse anti-Bassoon monoclonal antibody<br>Dilution: 1/200                 | Abcam               | Cat#Ab82958  |
| Rabbit anti-Iba1 monoclonal antibody<br>Dilution: 1/1000                  | Wako                | Cat#19_19741 |
| Mouse anti-CD68 monoclonal antibody<br>Dilution: 1/500                    | Biorad              | Cat#MCA1957  |
| Mouse anti-phospho-Tau (Ser202, Thr205)                                   | Thermo              | Cat#MN1020B  |

|                                                                                                                    |                                             |             |
|--------------------------------------------------------------------------------------------------------------------|---------------------------------------------|-------------|
| monoclonal antibody (AT8)<br>Dilution: 1/500<br>Mouse Anti- $\beta$ -Actin monoclonal antibody<br>Dilution: 1/5000 | Sigma-Aldrich®                              | Cat#A1978   |
| Mouse anti- $\beta$ -amyloid monoclonal antibody (4G8),<br>biotinylated<br>Dilution: 1/500                         | Biolegend                                   | Cat#800706  |
| Mouse Anti- $\gamma$ -Tubulin monoclonal antibody<br>Dilution: 1/5000                                              | Sigma-Aldrich®                              | Cat#T6557   |
| Rabbit anti-APP-Cter-17 antibody<br>Dilution: 1/2500                                                               | Gift from [Sergeant, 2002; Vingtdoux, 2005] |             |
| Rabbit anti-Glial fibrillary acidic protein (GFAP)<br>polyclonal antibody<br>Dilution: 1/10000                     | Dako                                        | Cat#Z0334   |
| Rabbit anti-Homer1 monoclonal antibody<br>Dilution: 1/400                                                          | Synaptic systems                            | Cat#160003  |
| Rabbit oligomer A11 Polyclonal antibody<br>Dilution: 1/2000                                                        | ThermoFisher                                | Cat#AHB0052 |
| Rabbit recombinant anti-Amyloid Precursor Protein monoclonal antibody (Y188)<br>Dilution: 1/2000                   | Abcam                                       | Cat#Ab32136 |

#### Chemicals and commercial assay or kit

|                                                  |                               |                     |
|--------------------------------------------------|-------------------------------|---------------------|
| ABC Vectastain® ABC-HRP kit                      | Vector Laboratories®          | Cat#PK6100          |
| Atipamezole                                      | Antisedan®, Vetoquinol        |                     |
| Benzonase                                        | This paper                    |                     |
| Bovine serum albumin (BSA)                       | Sigma-Aldrich®                | Cat#A7906           |
| Citrate Buffer 10X, pH 6.0                       | Diagnostic BioSystems®        | Cat#924             |
| Collagenase D                                    | Sigma-Merck                   | Cat#1108886600<br>1 |
| cOmplete™ protease inhibitor cocktail            | Roche                         | Cat#4693116001      |
| Cresyl violet                                    | Merck                         | Cat#10510-54-0      |
| Culture medium                                   | See composition in this paper |                     |
| DAB Substrate kit, Peroxidase (HRP), with Nickel | Vector Laboratories®          | Cat#SK4100          |

|                                                                                           |                                   |                    |
|-------------------------------------------------------------------------------------------|-----------------------------------|--------------------|
| DMEM, high glucose,<br>GlutaMAX™<br>Supplement                                            | ThermoFisher                      | Cat#10566016       |
| Dulbecco's Modified<br>Eagle's Medium<br>(DMEM)                                           | Sigma-Aldrich®                    | Cat#D6671          |
| Dulbecco's<br>phosphate saline<br>(DPBS) 1X                                               | Gibco™, ThermoFisher              | Cat#14190094       |
| ECL™ Western<br>Blotting Detection<br>Reagent                                             | GE Healthcare                     | Cat#28980926       |
| Ethanol absolute                                                                          | VWR                               | Cat#83813360       |
| Ethylene glycol                                                                           | Carlo Erba                        | Cat#346502         |
| Eukitt® mounting<br>medium                                                                | Chem-Lab®                         | Cat#50980467       |
| Fluorsave                                                                                 | VWR                               | Cat#345789-20      |
| Foetal bovine serum                                                                       | Sigma-Aldrich®                    | Cat#F7524          |
| Formic acid                                                                               | VWR®                              | Cat#BDH4554        |
| Glutamine                                                                                 | ThermoFisher                      | Cat#A2916801       |
| Glycerol                                                                                  | Fisher                            | Cat#12144481       |
| Horse serum                                                                               | Gibco™, ThermoFisher              | Cat#16050122       |
| Hydrogen peroxide<br>30%                                                                  | Sigma-Aldrich®                    | Cat#H1009          |
| Imidazole                                                                                 | Sigma-Aldrich®                    | Cat#56750          |
| In-Fusion HD Cloning<br>kit                                                               | Takara                            | Cat#638943         |
| Isopropyl-beta-D-<br>thiogalactopyranosid<br>e (IPTG)                                     | Euromedex                         | Cat#EU0008-B       |
| Ketamine                                                                                  | Imalgène® 1000, Merial            |                    |
| Kinetic Limulus<br>amebocyte lysate<br>(LAL) chromogenic<br>endotoxin<br>quantitation kit | Pierce™ Thermo Scientific         | Cat#PIER88282      |
| Laminin                                                                                   | Sigma-Aldrich®                    | Cat#L2020          |
| Lidocaine                                                                                 | 0.5% Xylovet®, Ceva Santé Animale |                    |
| Liquid nitrogen                                                                           | Air products, France              |                    |
| Luria broth (LB<br>medium)                                                                | Euromedex                         | Cat#AE0103         |
| MgCl <sub>2</sub>                                                                         | Merck                             | Cat#M8266-<br>100G |
| Na <sub>3</sub> VO <sub>4</sub>                                                           | Merck                             | Cat#450243-10G     |
| NaF                                                                                       | Merck                             | Cat#S6776-100G     |
| Nickel-nitriloacetic<br>acid (Ni-NTA) column                                              | Macherey nagel                    | Cat#7454105        |
| Normal goat serum<br>(NGS)                                                                | Sigma                             | Cat#G6767          |
| NuPAGETM Lithium<br>Dodecyl Sulfate (LDS)<br>sample buffer 4X                             | ThermoFisher                      | Cat#NP0007         |
| NuPAGE™ Sample<br>Reducing Agent 10X                                                      | ThermoFisher                      | Cat#NP0004         |

|                                            |                                            |                     |
|--------------------------------------------|--------------------------------------------|---------------------|
| Paracetamol                                | Doliprane®, Sanofi                         |                     |
| Paraformaldehyde,<br>PFA                   | Sigma                                      | Cat#P7148           |
| Penicillin/Streptomycin                    | Invitrogen                                 | Cat#15140-122       |
| Pentobarbital                              | Exagon®, Axience                           |                     |
| Phosphate buffer<br>solution, 1 M , pH 7.4 | Sigma-Aldrich®                             | Cat#P3619           |
| Phosphate Buffered<br>Saline (PBS), pH 7.4 | Sigma-Aldrich®                             | Cat#806552          |
| PMSF, 0.1M in<br>ethanol                   | Merck                                      | Cat#93482           |
| Poly-D-lysine<br>hydrobromide              | Sigma-Aldrich®                             | Cat#P6407           |
| Povidone iodine                            | Vétédine®, Vetoquinol                      |                     |
| Sarkosyl                                   | Merck                                      | L5777-100G          |
| Sodium chloride<br>(NaCl)                  | Sigma-Aldrich®                             | Cat#S9888           |
| Sucrose                                    | Sigma-Aldrich®                             | Cat#S0389           |
| Thioflavine T                              | Wako Chemical Industries Ltd, Osaka, Japan |                     |
| Tris-HCl                                   | Merck                                      | Cat#252859-<br>500G |
| Triton X-100                               | Sigma-Aldrich®                             | Cat#X100            |
| Ultra TMB-ELISA                            | Pierce™1-Step™ , Thermo Scientific         | Cat#34021           |
| Urea                                       | Euromedex                                  | Cat#EU0014B         |
| Xylazine                                   | 2% Rompun®, Bayer Healthcare               |                     |
| Xylene                                     | VWR Chemicals                              | Cat#28973363        |

### Equipements

|                                                   |                                                             |               |
|---------------------------------------------------|-------------------------------------------------------------|---------------|
| 60x water-immersion<br>objective                  | Nikon, melville, ny, usa                                    |               |
| 40x water-immersion<br>objective                  | Leica                                                       |               |
| Argon laser                                       | Nikon, melville, ny, usa                                    |               |
| Axio Scan.Z1                                      | Zeiss®                                                      |               |
| Centrifuge                                        | Multifuge X1R Heraeus Thermoscientific                      |               |
| Confocal optical<br>microscope (TCS SPE)          | Leica DMI6000                                               |               |
| EPC 10 Amplifier<br>Patchmaster Multi-<br>channel | HEKA Elektronik Dr. Schulze gmbh, Wiesenstrasse,<br>Germany |               |
| FACS                                              | Becton Dickinson FACScanto II                               |               |
| Heating box                                       | Phymep                                                      |               |
| Heating pad                                       | Phymep                                                      |               |
| Microtome                                         | Leica Vt1200 blade                                          |               |
| Open circular<br>swimming arena                   | This paper                                                  |               |
| Optima™ TL 100<br>Ultracentrifuge                 | Beckman                                                     |               |
| Perfusion pump                                    | Fisher Scientific                                           | Cat#1170-5369 |
| SM2400 microtome                                  | Leica Microsystems                                          |               |
| Sonicator                                         | Fischerbrand                                                |               |
| Spark plate reader                                | Tecan                                                       |               |

|                                     |                              |
|-------------------------------------|------------------------------|
| Spectrophotometer                   | Eppendorf biophotometer plus |
| Stereotaxic frame                   | Phymep, France               |
| SW32ti swinging bucket rotor        | Beckman                      |
| Ti C2 confocal microscope           | Nikon, melville, ny, usa     |
| TLA-100.2 fixed angle rotor         | Beckman                      |
| DMI6000 confocal optical microscope | TCS SPE, Leica               |

#### Experimental models: cell lines + bacteria

|                             |                              |
|-----------------------------|------------------------------|
| Escherichia coli bl21 (dE3) | New england BioLabs (C2987H) |
| HEK293T cells               | ATCC (CRL-3216)              |

#### Experimental models: Organisms / Strains

|                                        |                      |               |
|----------------------------------------|----------------------|---------------|
| APPswe/PS1dE9, C57Bl6 background, male | Jackson Laboratories | JAKS-5864     |
| OF1/SWISS                              | Janvier              |               |
| WT C57Bl6                              | Jackson Laboratories | JACKSIMA-0664 |

#### Gel, membranes

|                                                 |            |             |
|-------------------------------------------------|------------|-------------|
| Bis-Tris gel 4-12% Criterion™ XT                | Bio-Rad    | Cat#3450125 |
| Nitrocellulose membrane, 0.2 µm Precision Plus  | Bio-Rad    | Cat#1620112 |
| Protein™ Dual Xtra Prestained Protein Standards | Bio-Rad    | Cat#1610377 |
| SDS-PAGE gel                                    | This paper |             |
| XT MES Running Buffer                           | Bio-Rad    | Cat#1610789 |

#### Genetic reagent: Plasmids, cDNA

|                         |                                                         |
|-------------------------|---------------------------------------------------------|
| cDNAs of human APP695   | Dr Rémi Sadoul (Grenoble Institute of Neuroscience)     |
| cDNAs of Iceland mutant | This paper                                              |
| cDNAs of Swedish mutant | This paper                                              |
| Life-actin-GFP          | Addgene                                                 |
| pCMV-VSV-G plasmid      | Addgene                                                 |
| pet28a-vector           | Novagen, Paris, France                                  |
| pLenti-C-mCherry vector | Dr Christophe Bosc (Grenoble Institute of Neuroscience) |
| pmcherry-N1 vector      | Snapgene                                                |

|                            |                     |
|----------------------------|---------------------|
| psPAX2 plasmid             | Addgene             |
| Synthetic oligonucleotides | Sigma, Lyon, France |

### Material

|                                          |                                   |            |
|------------------------------------------|-----------------------------------|------------|
| 24-well plates                           | Falcon; Beckton Dickinson         |            |
| 35 mm glass-bottom dishes                | MatTek                            |            |
| Coverslips                               | MatTek                            |            |
| Stimulating bipolar microelectrodes      | World Precision Instruments, Inc. |            |
| Recording glass pipette filled with ACSF | Harvard Apparatus                 |            |
| sterile 96-well plate                    | BD Falcon                         | Cat#353916 |
| 34-gauge needles                         | Centravet, Dinan, France          |            |
| Hamilton syringes                        | Centravet, Dinan, France          |            |
| Superfrost Plus slides                   | Thermo-Scientific®                |            |

### Peptides

|                                                                                                                         |                |
|-------------------------------------------------------------------------------------------------------------------------|----------------|
| Fusion protein A $\beta$ (His) with wild-type human $\beta$ -amyloid 1-42 protein (A $\beta$ wt)                        | this paper     |
| Fusion protein A $\beta$ (His) with mutant human $\beta$ -amyloid 1-42 protein bearing the A2T mutation (A $\beta$ ice) | this paper     |
| Synthetic A $\beta$ 1-42                                                                                                | Covalb, France |

### Software and algorithms

|                                                     |                                                                                                                                                                           |
|-----------------------------------------------------|---------------------------------------------------------------------------------------------------------------------------------------------------------------------------|
| Patchmaster Multi-channel data acquisition software | HEKA Elektronik Dr. Schulze GmbH, Wiesenstrasse, Germany                                                                                                                  |
| NIS-Elements software                               | Nikon, Melville, NY, USA                                                                                                                                                  |
| AutoQuantX3 software                                | Media Cybernetics, Abingdon, Oxon, UK                                                                                                                                     |
| NeuronStudio software package                       | <a href="https://biii.eu/neuronstudio">https://biii.eu/neuronstudio</a> , CNIC – Mount Sinai School of Medicine                                                           |
| Ethovision XT 13                                    | Noldus <a href="https://www.noldus.com/ethovision-xt">https://www.noldus.com/ethovision-xt</a>                                                                            |
| ImageJ Software                                     | <a href="https://imagej.nih.gov/ij/download.html">https://imagej.nih.gov/ij/download.html</a>                                                                             |
| Zen 2.0 software                                    | Zeiss®, <a href="https://www.zeiss.com/microscopy/fr/produits/logiciel/zeiss-zen-lite.html">https://www.zeiss.com/microscopy/fr/produits/logiciel/zeiss-zen-lite.html</a> |
| Las X software                                      | Leica                                                                                                                                                                     |
| AutoQuant X3 software                               | <a href="https://www.meyerinst.com/mediacybernetics/autoquant/">https://www.meyerinst.com/mediacybernetics/autoquant/</a>                                                 |

ImageJ - 3D spots  
segmentation

<https://imagej.net/plugins/3d-segmentation>

ImageJ - DiAna

<https://imagej.net/plugins/distance-analysis>

Imaris 9.7

<https://imaris.oxinst.com/>

GraphPad Prism  
software 9

<https://www.graphpad.com/>
